# Supplementary material for: MreA Functions in the Global Regulation of Methanogenic Pathways in Methanosarcina acetivorans
Source: PubMed Central journal article supplement — mBio. 2012 Jul 31;3(4):e00189-12. doi: 10.1128/mBio.00189-12 (PMC3419521; doi:10.1128/mbio.00189-12), 2012-07-31
Supplement: mbo004121305sf02.pdf [file mbo004121305sf02.pdf]

Helix Turn Helix

|         |                                                                                       |    |
|---------|---------------------------------------------------------------------------------------|----|
| Tk TrmB | -----MR <b>EDEIIEKLQRLGLTKYESLAYITLLK</b> LGPSK <b>ATDITKES</b> GIPH <b>TRVYD</b>     | 50 |
| MreA    | MKDYEVKVLDEN <b>DHIFIETLRNLGMSRNVATTMAYLMNVDEAS</b> <b>SREIEIS</b> TGLRQ <b>PEVSL</b> | 60 |
|         | . . . : * * . * : . * * : : : : : * : : : . : : : * . : * : . . . *                   |    |

|         |                                                                                                |     |
|---------|------------------------------------------------------------------------------------------------|-----|
| Tk TrmB | <b>VLSSLHRK</b> GF <b>VDVM</b> QG-----TP- <b>RLYK</b> PVNP- <b>EVVLERIKEELIEDIEALKKAFDLY</b>   | 102 |
| MreA    | <b>AMRLMRN</b> QSW <b>VNVR</b> SEKKPGKGR <b>PIKIY</b> SLAAP <b>VDEIISYYEDKIYKESQATISAIKKLK</b> | 120 |
|         | . : . : . : . : . : * : * . . * : : : . : : : : : * . * : . *                                  |     |

|         |                      |     |
|---------|----------------------|-----|
| Tk TrmB | <b>REAH</b> GEEL-P-- | 111 |
| MreA    | <b>VM</b> SKKVPLTPTK | 132 |
|         | : : * *              |     |
