# Supplementary figures and images for: MreA Functions in the Global Regulation of Methanogenic Pathways in Methanosarcina acetivorans
Source: PubMed Central journal article supplement — mBio. 2012 Jul 31;3(4):e00189-12. doi: 10.1128/mBio.00189-12 (PMC3419521; doi:10.1128/mbio.00189-12), 2012-07-31

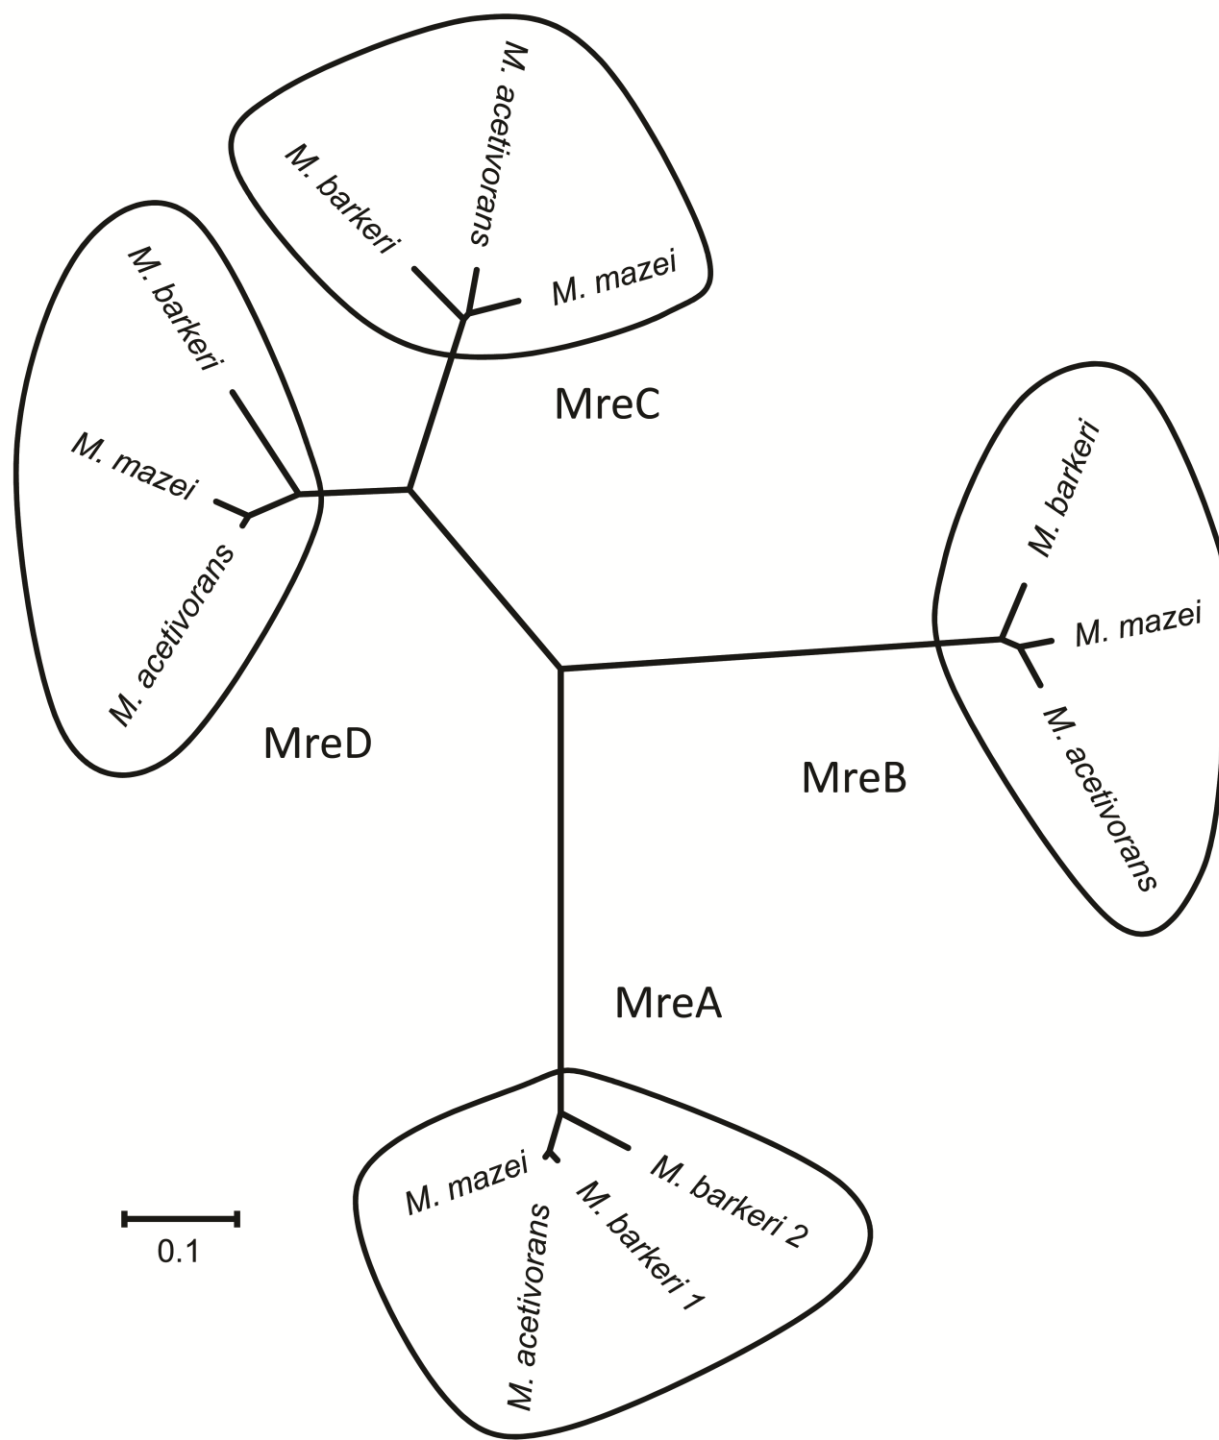

Supplement: mbo004121305sf04.pdf [file mbo004121305sf04.pdf]
